# Supplementary material
Source: publisher figshare collection journal article supplement (https://acs.figshare.com/ndownloader/files/3901699)
Supplement: Supplementary file 1 [file 3901699]

# Supporting Information for

## Metal-Catalyzed Electroless Etching of Silicon in Aerated HF/H<sub>2</sub>O Vapor for Facile Fabrication of Silicon Nanostructures

*Ya Hu,<sup>†</sup> Kui-Qing Peng,<sup>\*†</sup> Zhen Qiao,<sup>†</sup> Xing Huang,<sup>‡</sup> Fu-Qiang Zhang,<sup>†</sup> Rui-Nan Sun,<sup>†</sup> Xiang-Min Meng,<sup>‡</sup> Shuit-Tong Lee<sup>\*§</sup>*

<sup>†</sup>Department of Physics and Beijing Key Laboratory of Energy Conversion and Storage Materials, Beijing Normal University, Beijing, 100875, China

<sup>‡</sup>Technical Institute of Physics and Chemistry and Key Laboratory of Photochemical Conversion and Optoelectronic Materials, Chinese Academy of Sciences, Beijing, 100190, China

<sup>§</sup>Institute of Functional Nano and Soft Materials (FUNSOM) and Collaborative Innovation Center of Suzhou Nano Science and Technology, Soochow University, Suzhou, 215123, China

E-mail: kq\_peng@bnu.edu.cn; apannale@suda.edu.cn

**Silicon Nanowires Fabrication and Characterization:** All chemicals used were purchased from Sigma–Aldrich. p-type 1-10  $\Omega \cdot \text{cm}$  Si(100) and n-type 2-3  $\Omega \cdot \text{cm}$  Si(100) wafers purchased from General Research Institute for NonFerrous Metals (GRINM) was cut into pieces and ultrasonically degreased in acetone and ethanol for 5-10 minutes. The Si pieces are cleaned in the boiling solution of  $\text{H}_2\text{SO}_4/\text{H}_2\text{O}_2$  for 20-40 minutes. After each cleaning step, the Si pieces were thoroughly rinsed with deionized (DI) water. The Si pieces were coated with Ag particle film in aqueous solution of 5% HF and 0.02 M  $\text{AgNO}_3$  for 1 minute, and immediately rinsed with DI water and dried with nitrogen gas. Then the Si pieces were introduced into the reactor filled with atmospheric HF/ $\text{H}_2\text{O}$  vapor for vapor phase etching at room temperature. The morphology of the samples was characterized using a high-resolution scanning electron microscope (Hitachi-4800) and a high-resolution transmission electron microscope (JEM 2100F) equipped with energy-dispersive X-ray spectrometer. The evolved hydrogen in the gaseous reaction products is characterized using a Gas Chromatography (GC) equipped with a thermal conduction detector and a 5A molecular sieve column ( $\Phi 3 \times 3\text{m}$ ) with nitrogen serving as the carrier gas.

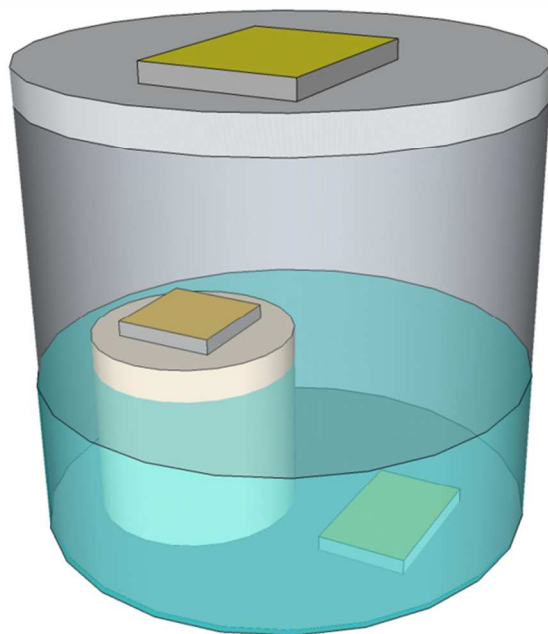

**Figure S1.** Schematic illustration of MACE of silicon in atmospheric HF/H<sub>2</sub>O vapor. As a reference, two silicon substrates coated with AgNPs were placed in air outside the reactor (HF-free) or in aqueous HF solution, respectively.

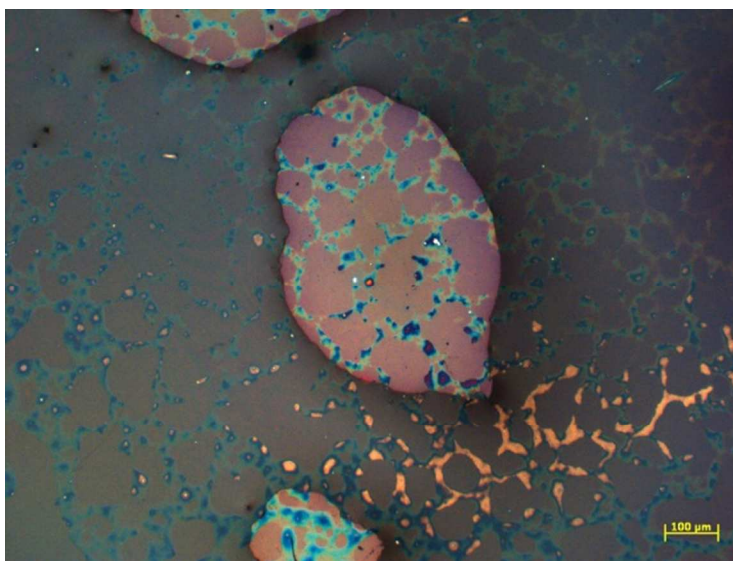

**Figure S2.** Microscope graph of the invisible electrolyte layer condensed on silicon surface after 15 minutes.

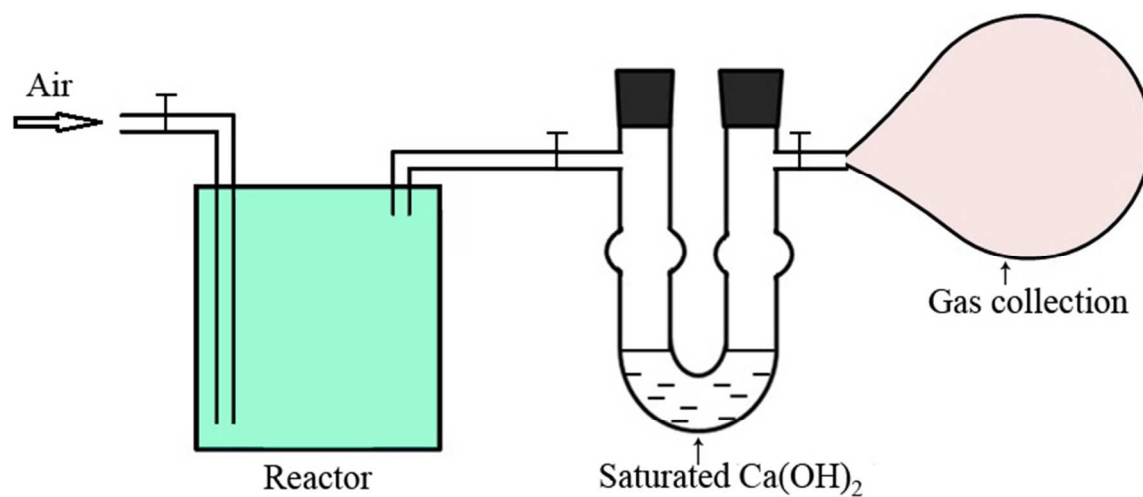

**Figure S3.** Schematic illustration of the experimental setup for gaseous product collection.

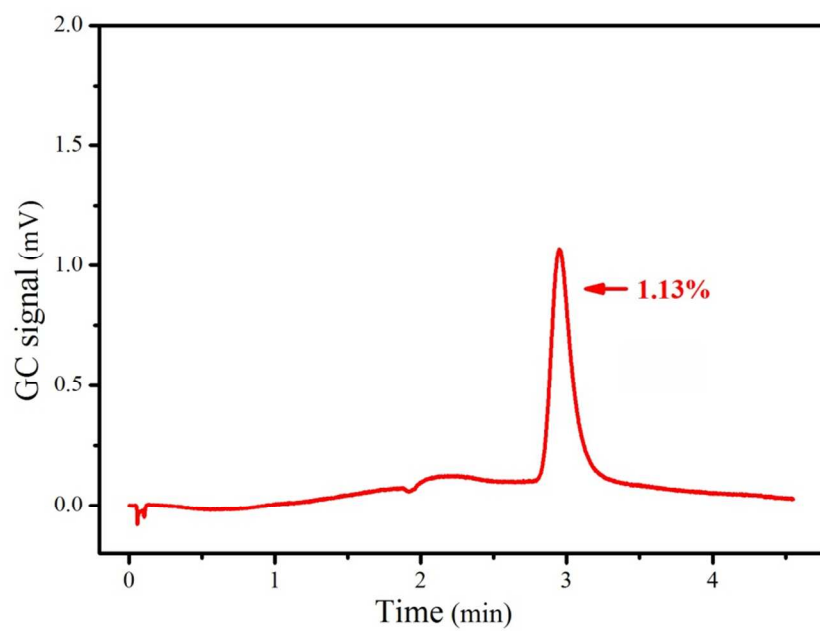

**Figure S4.** A typical gas chromatography (GC) trace of evolved hydrogen.

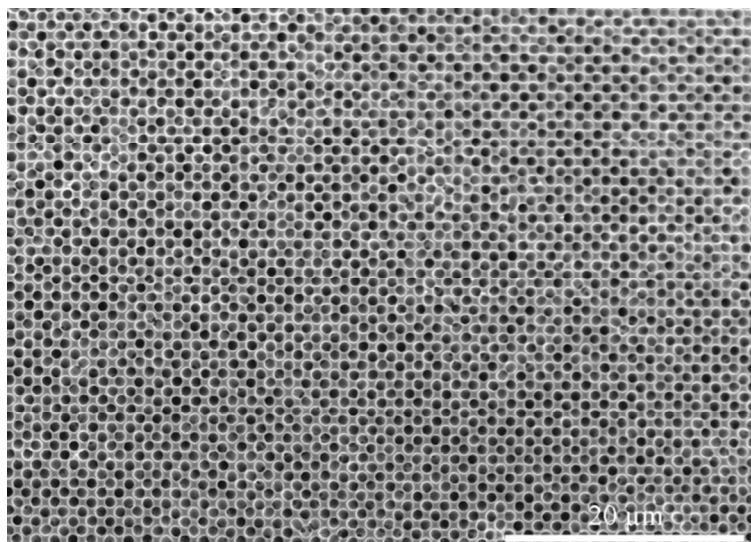

**Figure S5.** SEM image of ordered silicon nanohole array on p-type 1-10  $\Omega \cdot \text{cm}$  Si(100) substrate produced by the combination of deep ultraviolet lithography (UVL) and enhanced MCEEE of silicon in aerated HF/H<sub>2</sub>O vapor.

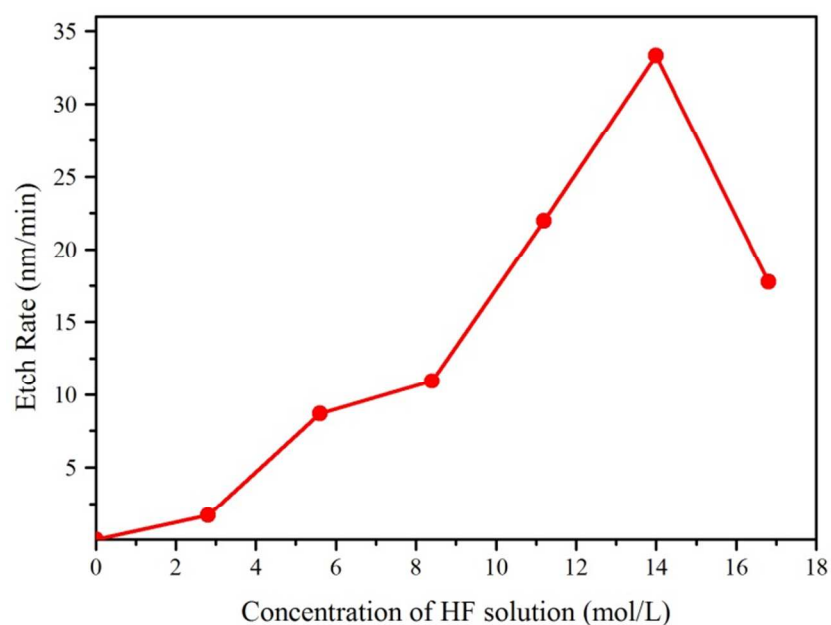

**Figure S6.** Plot of experimental etch rate of silicon against concentration of aqueous HF solution used for vaporization.

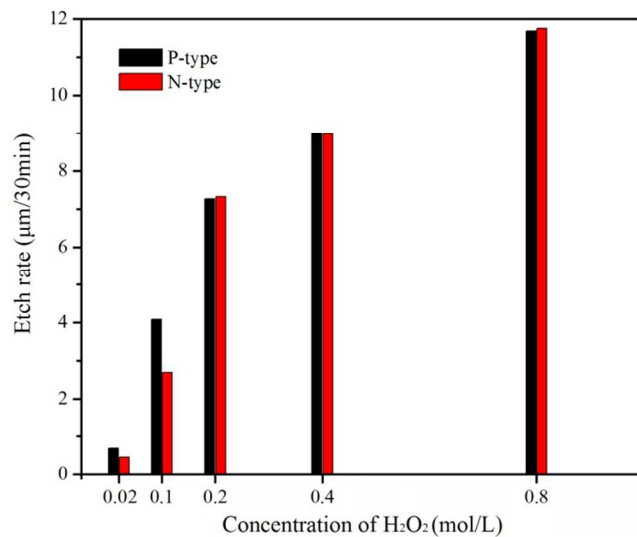

**Figure S7.** Comparison of etch rate of 1-10  $\Omega \cdot \text{cm}$  p-Si(100) and 2-3  $\Omega \cdot \text{cm}$  n-Si(100) by MCEE in aqueous HF- $\text{H}_2\text{O}_2$  solution.

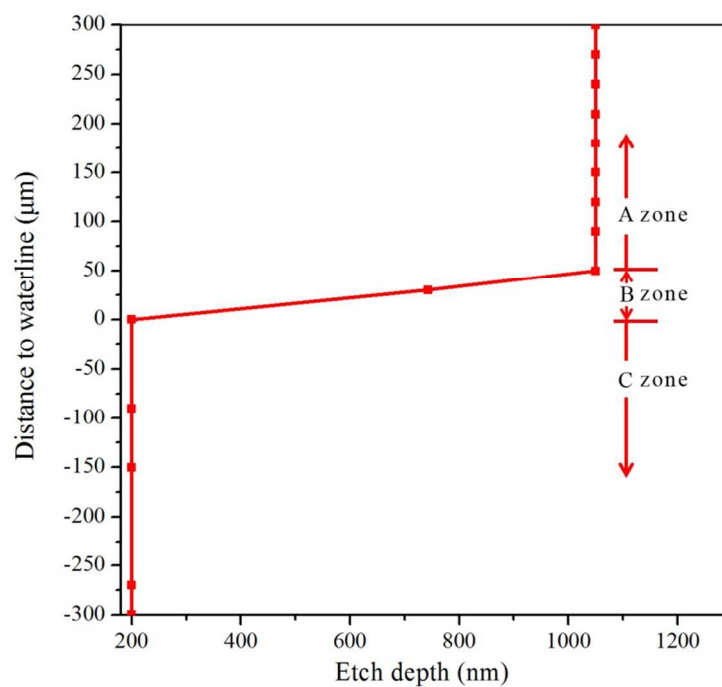

**Figure S8.** Plot of the silicon etch depth in 30 min vs. distance to waterline
